# Supplementary material for: Engineering Escherichia coli with a symbiotic plasmid for the production of phenylpyruvic acid
Source: Royal Society of Chemistry journal article supplement (doi:10.1039/d4ra03707c), 2024-01-01
Supplement: d4ra03707c1.pdf [file d4ra03707c1.pdf]

1 \*Supporting Information:

2

3

4 **Engineering *Escherichia coli* strains with symbiotic plasmid for production of phenylpyruvic acid**

5 Tianzhen Xiong\*, Jiting Zhang, Jiaguang Zhang, Can Zhang, Huidie Yue, Junling Liu, Dingyuan Bai,

6 Jinying Li

7 College of Life Science, Xinyang Normal University, Xinyang, Henan 464000, China

8 First author and corresponding author: Tianzhen Xiong

9 Tel.: +86-13939748578

10 E-mail: [tzxiong@xynu.edu.cn](mailto:tzxiong@xynu.edu.cn)

11 Address: Xinyang Normal University, 237 Nanhu Road, Xinyang, Henan 464000, China

12

13 **Supporting Figures**

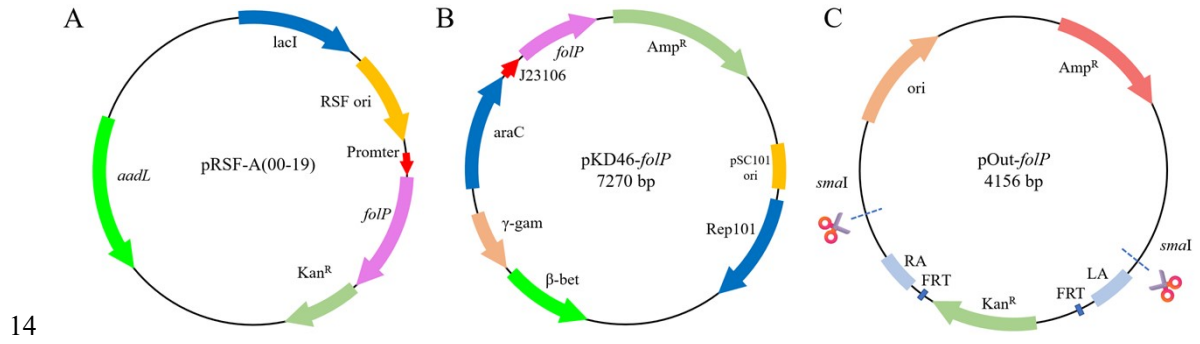

17

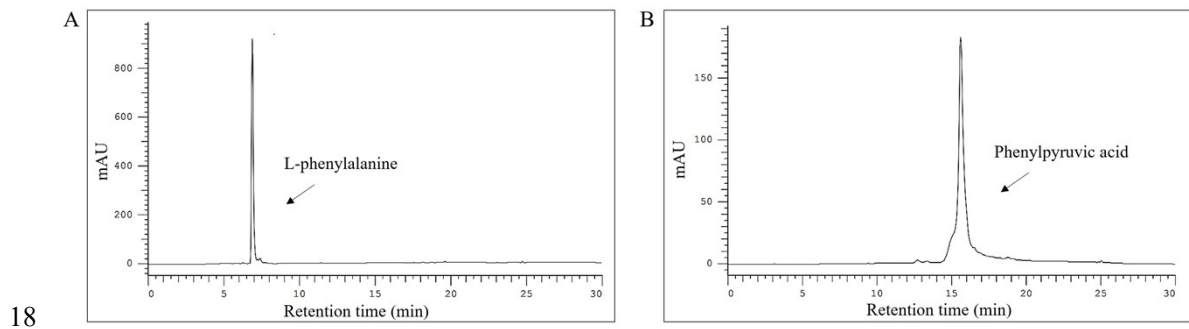

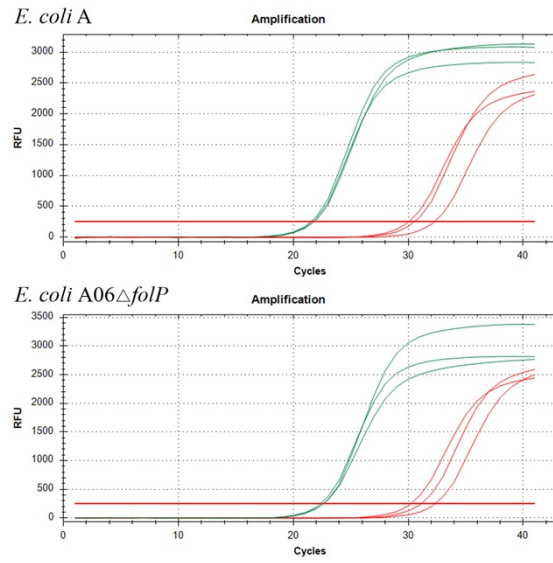

22

23 **Figure S3.** The amplification curve of quantitative PCR from *E. coli A* and *E. coli A06 $\Delta$ folP*. The red  
24 line is threshold line, the amplification curve of 16S is marked in red and the amplification curve of *aadL*  
25 is marked in green.

26

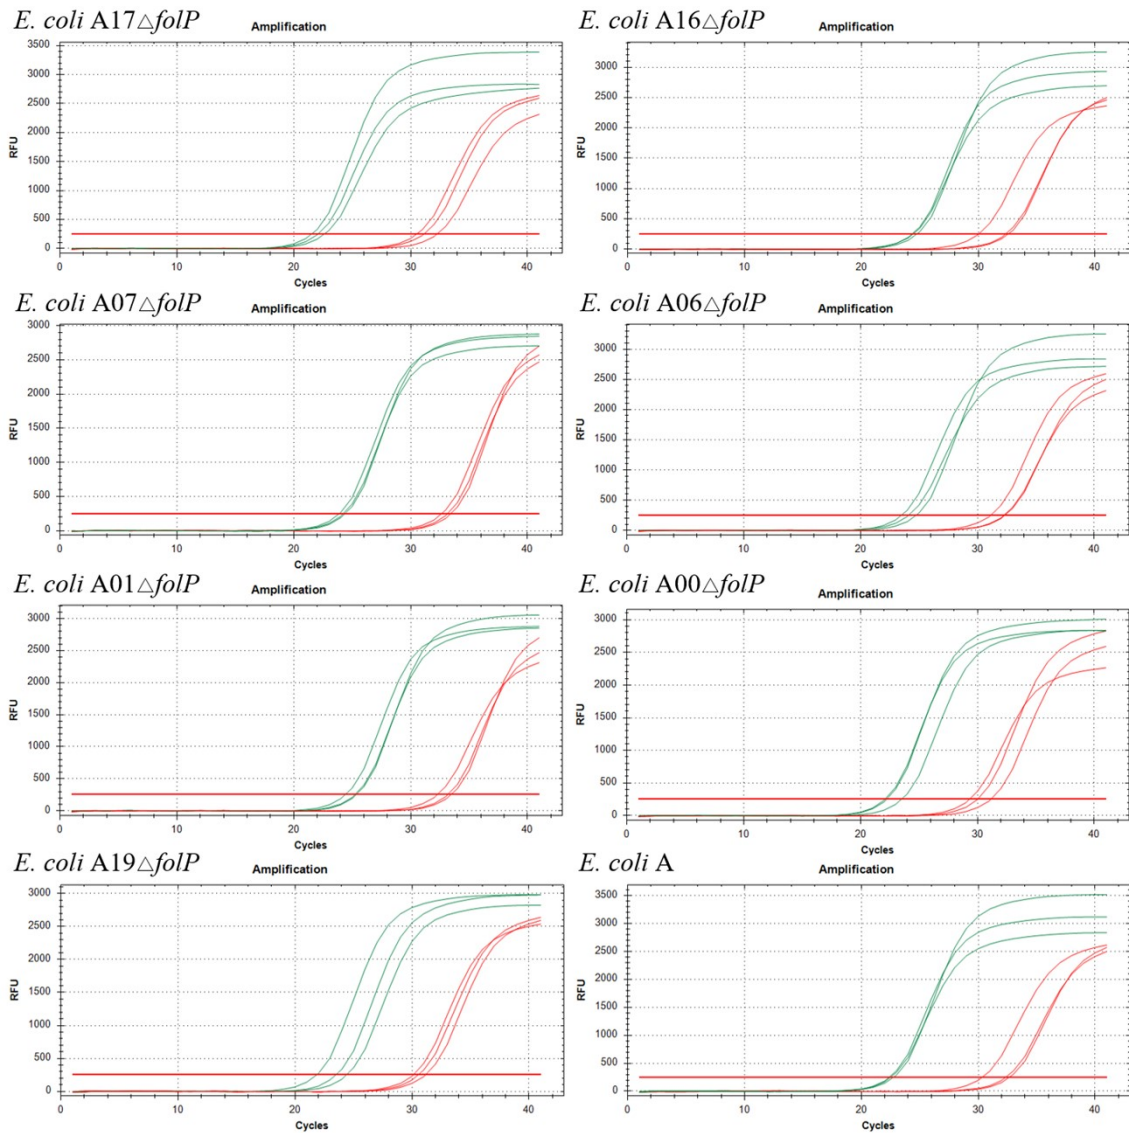

27

28 **Figure S4.** The amplification curve of quantitative PCR from engineered *Escherichia coli* with promoters  
 29 of differing strength. The red line is threshold line, the amplification curve of 16S is marked in red and  
 30 the amplification curve of *aadL* is marked in green.

31

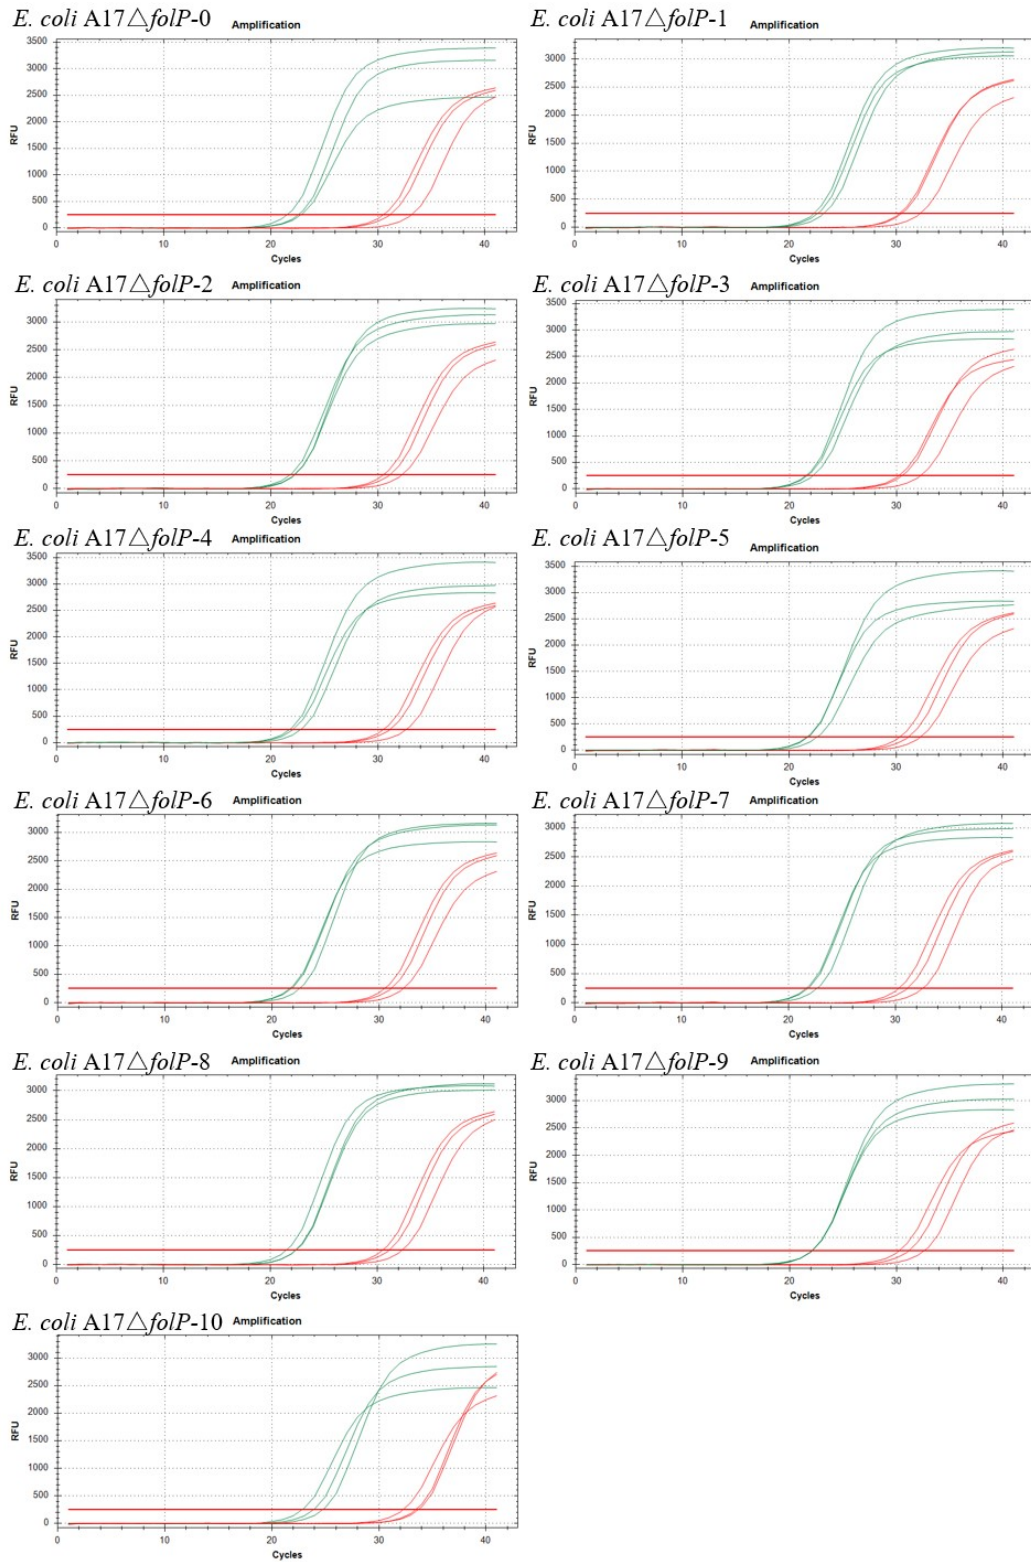

32

33 **Figure S5.** The amplification curve of quantitative PCR from *E. coli* A17 $\Delta$ folP for different generation.

34 The red line is threshold line, the amplification curve of 16S is marked in red and the amplification curve

35 of *aadL* is marked in green.

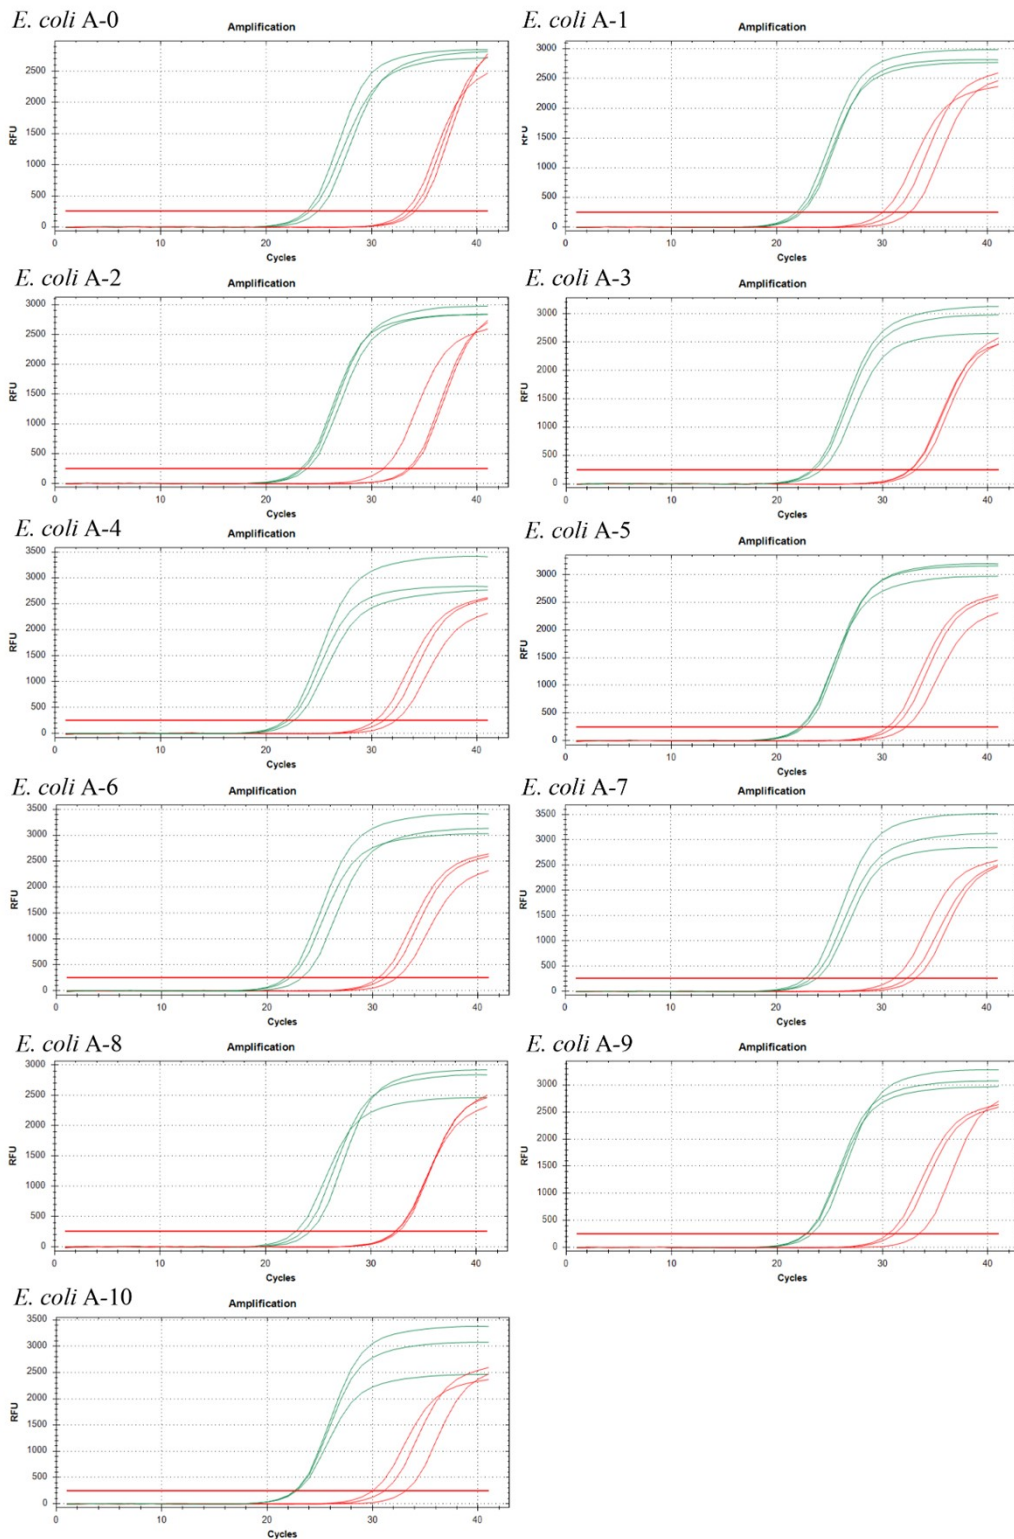

36

37 **Figure S6.** The amplification curve of quantitative PCR from *E. coli* A for different generation. The red  
 38 line is threshold line, the amplification curve of 16S is marked in red and the amplification curve of *aadL*  
 39 is marked in green.

40 **Supporting Tables**41 **Table S1.** Primers used in the work

| Primers                 | Sequences, 5'-3'                                                                                                                               |
|-------------------------|------------------------------------------------------------------------------------------------------------------------------------------------|
| <i>aadL</i> -BamHI (F)  | G <b><u>CGGATCC</u></b> GATGAATATTTCTCGCCGTAAAC                                                                                                |
| <i>aadL</i> -EcoRI (R)  | G <b><u>CGAATTC</u></b> TTACTTCTTGAAACGGTCAAGTG                                                                                                |
| <i>folP</i> -J23100 (F) | G <b><u>CGCATGC</u></b> GGCGCGCCTTGACGGCTAGCTCAGTCCTAGGTACAGTGCT<br>AGCTTAATTTGTTTAACTTTAATTCACACAGGAAAGTACTAGATATAAT<br>GAAACTCTTTGCCCAGGGTAC |
| <i>folP</i> -J23101 (F) | G <b><u>CGCATGC</u></b> GGCGCGCCTTTACAGCTAGCTCAGTCCTAGGTATTATGCTA<br>GCCAGTTTTGTTTAACTTTAATTCACACAGGAAAGTACTAGATATAATG<br>AAACTCTTTGCCCAGGGTAC |
| <i>folP</i> -J23106 (F) | G <b><u>CGCATGC</u></b> GGCGCGCCTTTACGGCTAGCTCAGTCCTAGGTATAGTGCTA<br>GCGATAGTTGTTTAACTTTAATTCACACAGGAAAGTACTAGATATAATG<br>AAACTCTTTGCCCAGGGTAC |
| <i>folP</i> -J23107 (F) | G <b><u>CGCATGC</u></b> GGCGCGCCTTTACGGCTAGCTCAGCCCTAGGTATTATGCTA<br>GCATGGATTGTTTAACTTTAATTCACACAGGAAAGTACTAGATATAATG<br>AAACTCTTTGCCCAGGGTAC |
| <i>folP</i> -J23116 (F) | G <b><u>CGCATGC</u></b> GGCGCGCCTTGACAGCTAGCTCAGTCCTAGGGACTATGCT<br>AGCAGGATTTGTTTAACTTTAATTCACACAGGAAAGTACTAGATATAAT<br>GAAACTCTTTGCCCAGGGTAC |
| <i>folP</i> -J23117 (F) | G <b><u>CGCATGC</u></b> GGCGCGCCTTGACAGCTAGCTCAGTCCTAGGGATTGTGCT<br>AGCCAATCTTGTTTAACTTTAATTCACACAGGAAAGTACTAGATATAAT<br>GAAACTCTTTGCCCAGGGTAC |
| <i>folP</i> -J23119 (F) | G <b><u>CGCATGC</u></b> GGCGCGCCTTGACAGCTAGCTCAGTCCTAGGTATAATGCT<br>AGCACGAATTGTTTAACTTTAATTCACACAGGAAAGTACTAGATATAAT<br>GAAACTCTTTGCCCAGGGTAC |
| <i>folP</i> (R)         | CG <b><u>CCCGGG</u></b> TTACTCATAGCGTTTGTTCCTTTGC                                                                                              |
| pKD46- <i>folP</i> (F)  | CCGTCAAGTTGTCATAATAAATCGGCGCGCCTTTACGGCTAGCTCAGTC<br>CTAGGTATAGTGCTAGCGATAGTTGTTTAACTTTAATTCACACAGGAAA<br>GTACTAGATATAATGAAACTCTTTGCCCAGGGTAC  |
| pKD46- <i>folP</i> (R)  | GCCACCTGCATCGATTTTTACTCATAGCGTTTGTTCCTTTG                                                                                                      |
| pOut- <i>folP</i> (F)   | <b><u>CCCGGG</u></b> ATGAAACTCTTTGCCCAGGGTACTTCACTGGACCTTAGCCATC<br>CTCACGTAATGGATCAGTGATAAGCTGTCAAACATG                                       |

|                       |                                                                                               |
|-----------------------|-----------------------------------------------------------------------------------------------|
| pOut- <i>folP</i> (R) | <u>CCCGGG</u> TTACTCATAGCGTTTGTTCCTTTGCAGACAGAGTGGCTTCC<br>ACCACCCGTTGAGCGATTGTGTAGGCTGGAGCTG |
| qPCR-16S (F)          | CTCTTGCCATCGGATGTGCCCA                                                                        |
| qPCR-16S (R)          | CCAGTGTGGCTGGTCATCCTCTCA                                                                      |
| qPCR- <i>aadL</i> (F) | AATCATTAGTTACCAGACATC                                                                         |
| qPCR- <i>aadL</i> (R) | GAGTGCGATAGGAAGTAT                                                                            |

42

43 **Table S2. Plasmids and strains used in this study.**

| Plasmids and strains                       | Description                                                  | Source     |
|--------------------------------------------|--------------------------------------------------------------|------------|
| <i>E. coli</i> DH5 $\alpha$                | Wild type                                                    | Lab stock  |
| <i>E. coli</i> BL21(DE3)                   | Wild type                                                    | Lab stock  |
| pKD46                                      | Recombinase, <i>AmpR</i>                                     | Lab stock  |
| PCP20                                      | pSC101 ori, <i>AmpR</i>                                      | Lab stock  |
| pKD3                                       | <i>CmR</i> flanked by FRT sites                              | Lab stock  |
| pRSFDuet-1                                 | Double T7 promoters, RSF ori, <i>KanR</i>                    | Novagen    |
| T-Vector pMD19 (Simple)                    | T vector, <i>AmpR</i>                                        | TaKaRa     |
| pKD46- <i>folP</i>                         | Recombinase, <i>AmpR</i> and <i>folP</i>                     | This study |
| pOut- <i>folP</i>                          | T-Vector carrying <i>folP</i> , <i>CmR</i> homologous arms   | This study |
| pRSF- <i>aadL</i>                          | pRSFDuet-1 carrying <i>aadL</i>                              | This study |
| pRSF-A00                                   | pRSF- <i>aadL</i> carrying J23100, B0032 and <i>folP</i>     | This study |
| pRSF-A01                                   | pRSF- <i>aadL</i> carrying J23101, B0032 and <i>folP</i>     | This study |
| pRSF-A06                                   | pRSF- <i>aadL</i> carrying J23106, B0032 and <i>folP</i>     | This study |
| pRSF-A07                                   | pRSF- <i>aadL</i> carrying J23107, B0032 and <i>folP</i>     | This study |
| pRSF-A16                                   | pRSF- <i>aadL</i> carrying J23116, B0032 and <i>folP</i>     | This study |
| pRSF-A17                                   | pRSF- <i>aadL</i> carrying J23117, B0032 and <i>folP</i>     | This study |
| pRSF-A19                                   | pRSF- <i>aadL</i> carrying J23119, B0032 and <i>folP</i>     | This study |
| <i>E. coli</i> pKD46- <i>folP</i>          | <i>E. coli</i> BL21(DE3) harboring pKD46- <i>folP</i>        | This study |
| <i>E. coli</i> pKD46 $\square$ <i>folP</i> | <i>E. coli</i> pKD with the deletion of <i>folP</i>          | This study |
| <i>E. coli</i> BL21 $\square$ <i>folP</i>  | <i>E. coli</i> BL21 deleting <i>folP</i> from chromosome     | This study |
| <i>E. coli</i> A                           | <i>E. coli</i> BL21(DE3) harboring pRSF- <i>aadL</i>         | This study |
| <i>E. coli</i> A00 $\square$ <i>folP</i>   | <i>E. coli</i> BL21 $\square$ <i>folP</i> harboring pRSF-A00 | This study |
| <i>E. coli</i> A01 $\square$ <i>folP</i>   | <i>E. coli</i> BL21 $\square$ <i>folP</i> harboring pRSF-A01 | This study |
| <i>E. coli</i> A06 $\square$ <i>folP</i>   | <i>E. coli</i> BL21 $\square$ <i>folP</i> harboring pRSF-A06 | This study |



|                                 |                                                     |            |
|---------------------------------|-----------------------------------------------------|------------|
| <i>E. coli</i> A07□ <i>folP</i> | <i>E. coli</i> BL21□ <i>folP</i> harboring pRSF-A07 | This study |
| <i>E. coli</i> A16□ <i>folP</i> | <i>E. coli</i> BL21□ <i>folP</i> harboring pRSF-A16 | This study |
| <i>E. coli</i> A17□ <i>folP</i> | <i>E. coli</i> BL21□ <i>folP</i> harboring pRSF-A17 | This study |
| <i>E. coli</i> A19□ <i>folP</i> | <i>E. coli</i> BL21□ <i>folP</i> harboring pRSF-A19 | This study |

44

45 **Table S3. Comparison of promoters used in this study**

| Name   | Sequence (5'-3')                                 | number<br>in library |
|--------|--------------------------------------------------|----------------------|
| J23117 | GGCGCGCCTTGACAGCTAGCTCAGTCCTAGGGATTGTGCTAGCCAATC | 5                    |
| J23116 | GGCGCGCCTTGACAGCTAGCTCAGTCCTAGGGACTATGCTAGCAGGAT | 14                   |
| J23107 | GGCGCGCCTTTACGGCTAGCTCAGCCCTAGGTATTATGCTAGCATGGA | 18                   |
| J23106 | GGCGCGCCTTTACGGCTAGCTCAGTCCTAGGTATAGTGCTAGCGATAG | 27                   |
| J23101 | GGCGCGCCTTTACAGCTAGCTCAGTCCTAGGTATTATGCTAGCCAGTT | 44                   |
| J23100 | GGCGCGCCTTGACGGCTAGCTCAGTCCTAGGTACAGTGCTAGCTTAAT | 56                   |
| J23119 | GGCGCGCCTTGACAGCTAGCTCAGTCCTAGGTATAATGCTAGCACGAA | 82                   |
| B0032  | TCACACAGGAAAGTACTAG                              | 29                   |

46
